# Supplementary material
Source: PubMed Central journal article supplement (PMC8184605)
Supplement: NIHMS1688134-supplement-Supplemental_Tables.pdf [file NIHMS1688134-supplement-Supplemental_Tables.pdf]

**Supplementary Table 1.** Comparison of the characteristics between the PLCO and Harvard study

| Characteristics                  | PLCO      |            | HLCS      |            | <i>P</i> * |
|----------------------------------|-----------|------------|-----------|------------|------------|
|                                  | Frequency | Deaths (%) | Frequency | Deaths (%) |            |
| Total                            | 1,185     | 798 (67.3) | 984       | 665 (67.5) |            |
| Median overall survival (months) | 23.8      |            | 39.9      |            |            |
| Age                              |           |            |           |            |            |
| ≤71                              | 636       | 400 (62.9) | 654       | 428 (65.4) | <0.0001    |
| >71                              | 549       | 398 (72.5) | 330       | 237 (71.8) |            |
| Sex                              |           |            |           |            |            |
| Male                             | 698       | 507 (72.6) | 507       | 379 (74.7) | 0.0006     |
| Female                           | 487       | 291 (59.8) | 477       | 286 (59.9) |            |
| Smoking status                   |           |            |           |            |            |
| Never                            | 115       | 63 (54.8)  | 92        | 52 (56.5)  | 0.166      |
| Current                          | 423       | 272 (64.3) | 390       | 266 (68.2) |            |
| Former                           | 647       | 463 (71.6) | 502       | 347 (69.1) |            |
| Histology                        |           |            |           |            |            |
| Adenocarcinoma                   | 577       | 348 (60.3) | 597       | 378 (63.3) | <0.0001    |
| Squamous cell carcinoma          | 285       | 192 (67.4) | 216       | 156 (72.2) |            |
| Others                           | 323       | 258 (79.9) | 171       | 131 (76.6) |            |
| Stage                            |           |            |           |            |            |
| I - IIIA                         | 655       | 315 (48.1) | 606       | 352 (58.0) | 0.003      |
| IIIB - IV                        | 528       | 482 (91.3) | 377       | 313 (83.0) |            |
| Missing                          | 2         |            | --        |            |            |

Abbreviations: PLCO, Prostate, Lung, Colorectal and Ovarian Cancer Screening Trial. HLCS, Harvard Lung Cancer Suceptibility.

\*Chi-square test for the comparison of the characteristics between the PLCO trial and Harvard study for each clinical variable.

**Supplementary Table 2.** List of 98 selected genes in the GnRH signaling pathway gene-set used in the discovery analysis

| Dataset | Name of pathway <sup>a</sup> | Selected genes                                                                                                                                                                                                                                                                                                                                                                                                                                                                                                                                                                                                                                                                                                                                                                                                            | Number of genes |
|---------|------------------------------|---------------------------------------------------------------------------------------------------------------------------------------------------------------------------------------------------------------------------------------------------------------------------------------------------------------------------------------------------------------------------------------------------------------------------------------------------------------------------------------------------------------------------------------------------------------------------------------------------------------------------------------------------------------------------------------------------------------------------------------------------------------------------------------------------------------------------|-----------------|
| KEGG    | GNRH_SIGNALING_PATHWAY       | <i>ADCY1, ADCY2, ADCY3, ADCY4, ADCY5, ADCY6, ADCY7, ADCY8, ADCY9, ATF4, CACNA1C, CACNA1D, CACNA1F<sup>b</sup>, CACNA1S, CALM1, CALM2, CALM3, CALML3, CALML5, CALML6, CAMK2A, CAMK2B, CAMK2D, CAMK2G, CDC42, CGA, EGFR, ELK1<sup>b</sup>, FSHB, GNAI1, GNAQ, GNAS, GNRH1, GNRH2, GNRHR, GRB2, HBEGF, HRAS, ITPR1, ITPR2, ITPR3, JMJD7-PLA2G4B, JUN, KRAS, LHB, MAP2K1, MAP2K2, MAP2K3, MAP2K4, MAP2K6, MAP2K7, MAP3K1, MAP3K2, MAP3K3, MAP3K4, MAPK1, MAPK10, MAPK11, MAPK12, MAPK13, MAPK14, MAPK3, MAPK7, MAPK8, MAPK9, MMP14, MMP2, NRAS, PLA2G10, PLA2G12A, PLA2G12B, PLA2G1B, PLA2G2A, PLA2G2C, PLA2G2D, PLA2G2E, PLA2G2F, PLA2G3, PLA2G4A, PLA2G4B, PLA2G4E, PLA2G5, PLA2G6, PLCB1, PLCB2, PLCB3, PLCB4, PLD1, PLD2, PRKACA, PRKACB, PRKACG, PRKCA, PRKCB, PRKCD, PRKX<sup>b</sup>, PTK2B, RAF1, SOS1, SOS2, SRC</i> | 101             |
| Total   |                              |                                                                                                                                                                                                                                                                                                                                                                                                                                                                                                                                                                                                                                                                                                                                                                                                                           | 101             |

<sup>a</sup> Genes were selected based on online datasets.

<sup>b</sup> Genes in X chromosome had been removed.

Keyword: GNRH

Organism: Homo sapiens

**Supplementary Table 3.** Associations of the first 10 principal components and OS of NSCLC in the PLCO trial

| <b>PC*</b> | <b>Parameter Estimate</b> | <b>Standard Error</b> | <b>Chi-Square</b> | <b>P</b> |
|------------|---------------------------|-----------------------|-------------------|----------|
| PC1        | 4.821                     | 1.353                 | 12.697            | <0.001   |
| PC2        | -0.681                    | 1.228                 | 0.308             | 0.579    |
| PC3        | -3.054                    | 0.949                 | 10.351            | 0.001    |
| PC4        | -2.837                    | 1.246                 | 5.184             | 0.023    |
| PC5        | -0.910                    | 1.232                 | 0.546             | 0.460    |
| PC6        | 1.355                     | 1.252                 | 1.172             | 0.279    |
| PC7        | -0.236                    | 1.218                 | 0.038             | 0.846    |
| PC8        | -1.684                    | 1.322                 | 1.622             | 0.203    |
| PC9        | -1.886                    | 1.267                 | 2.216             | 0.137    |
| PC10       | 0.347                     | 1.240                 | 0.078             | 0.180    |

Abbreviations: OS, overall survival; NSCLC, non-small cell lung cancer; PLCO, the Prostate, Lung, Colorectal and Ovarian Cancer Screening Trial; PC, principal component.

\*The first 4 were used for the adjustment for population stratification in the multivariate analysis.

**Supplementary Table 4.** Function prediction of the seven validated SNPs associated with survival of NSCLC Data obtained from RegulomeDB<sup>1</sup> and Haploreg v4.1

| SNP         | Genes        | LD (r <sup>2</sup> ) | Chr. | RegDB <sup>1</sup> | Epigenome ID (EID) | Description                                         | H3K4me1 <sup>2</sup> | H3K4me3 | H3K27ac <sup>2</sup> | Motifs changed    | selected eQTL hits |
|-------------|--------------|----------------------|------|--------------------|--------------------|-----------------------------------------------------|----------------------|---------|----------------------|-------------------|--------------------|
| rs4150236   | <i>HBEGF</i> | 1                    | 5    | 5                  | E096               | Lung                                                | H3K4me1_Enh          |         | H3K27ac_Enh          | 5 altered motifs  | 14 hits            |
| rs4150230   | <i>HBEGF</i> | 0.93                 | 5    | 5                  | E096               | Lung                                                |                      |         |                      | 5 altered motifs  | 19 hits            |
| rs4150232   | <i>HBEGF</i> | 0.91                 | 5    | 6                  | E096               | Lung                                                |                      |         |                      | BDP1, GR, LUN-1   | 19 hits            |
| rs4150234   | <i>HBEGF</i> | 0.96                 | 5    | 6                  | E096               | Lung                                                | H3K4me1_Enh          |         |                      | 6 altered motifs  | 18 hits            |
| rs13385     | <i>HBEGF</i> | 0.96                 | 5    | 4                  | E096               | Lung                                                | H3K4me1_Enh          |         |                      | EBF, PRDM1        | 21 hits            |
| rs2237078   | <i>HBEGF</i> | 0.91                 | 5    | 6                  | E096               | Lung                                                |                      |         |                      | 11 altered motifs | 20 hits            |
| rs116454384 | <i>ITPR3</i> |                      | 6    | 5                  | E114               | A549 EtOH<br>0.02pct Lung<br>Carcinoma Cell<br>Line | H3K4me1_Enh          |         | H3K27ac_Enh          | 32 altered motifs | 9 hits             |

1 RegulomeDB: <http://regulomedb.org/>

2 Haploreg: <http://archive.broadinstitute.org/mammals/haploreg/haploreg.php>

Abbreviations: NSCLC: non-small cell lung cancer; SNP, single nucleotide polymorphism; LD: linkage disequilibrium; Chr.: chromosome; H3K4me1: monomethylation of the 4th lysine of histone 3; H3K4me3: histone H3 lysine 4 trimethylation; H3K27ac: acetylation of histone H3 lysine 27; eQTL: expression quantitative trait loci.

**Supplementary Table 5. Stratified analysis for association between the protective genotypes and survival of NSCLC patients in the PLCO trial<sup>a</sup>**

| Characteristics | OS                                  |            |                                       |            |                                    |               |                                        | DSS                                 |            |                                       |            |                                    |               |                                        |
|-----------------|-------------------------------------|------------|---------------------------------------|------------|------------------------------------|---------------|----------------------------------------|-------------------------------------|------------|---------------------------------------|------------|------------------------------------|---------------|----------------------------------------|
|                 | 0 protective genotypes <sup>b</sup> |            | 1-2 protective genotypes <sup>b</sup> |            | Multivariate analysis <sup>c</sup> |               | <i>P</i> <sub>inter</sub> <sup>d</sup> | 0 protective Genotypes <sup>b</sup> |            | 1-2 protective genotypes <sup>b</sup> |            | Multivariate analysis <sup>c</sup> |               | <i>P</i> <sub>inter</sub> <sup>d</sup> |
|                 | All                                 | Death (%)  | All                                   | Death (%)  | HR (95% CI)                        | <i>P</i>      |                                        | All                                 | Death (%)  | All                                   | Death (%)  | HR (95% CI)                        | <i>P</i>      |                                        |
| Age (years)     |                                     |            |                                       |            |                                    |               |                                        |                                     |            |                                       |            |                                    |               |                                        |
| ≤ 71            | 266                                 | 188 (70.7) | 368                                   | 211 (57.3) | 0.77 (0.63-0.94)                   | <b>0.012</b>  |                                        | 266                                 | 170 (63.9) | 368                                   | 189 (51.4) | 0.78 (0.63-0.97)                   | <b>0.023</b>  |                                        |
| > 71            | 223                                 | 166 (74.4) | 318                                   | 224 (70.4) | 0.78 (0.63-0.96)                   | <b>0.020</b>  | 0.896                                  | 223                                 | 154 (69.1) | 318                                   | 196 (61.6) | 0.74 (0.60-0.93)                   | <b>0.008</b>  | 0.497                                  |
| Sex             |                                     |            |                                       |            |                                    |               |                                        |                                     |            |                                       |            |                                    |               |                                        |
| Male            | 289                                 | 221 (76.5) | 406                                   | 284 (70.0) | 0.73 (0.61-0.87)                   | <b>0.0006</b> |                                        | 289                                 | 200 (69.2) | 406                                   | 244 (60.1) | 0.71 (0.58-0.86)                   | <b>0.0005</b> |                                        |
| Female          | 200                                 | 133 (66.5) | 280                                   | 151 (53.9) | 0.83 (0.64-1.06)                   | 0.130         | 0.465                                  | 200                                 | 124 (62.0) | 280                                   | 141 (50.4) | 0.82 (0.64-1.06)                   | 0.134         | 0.334                                  |
| Smoking status  |                                     |            |                                       |            |                                    |               |                                        |                                     |            |                                       |            |                                    |               |                                        |
| Never           | 49                                  | 34 (69.4)  | 65                                    | 28 (43.1)  | 0.57 (0.32-1.00)                   | 0.049         |                                        | 49                                  | 32 (65.3)  | 65                                    | 28 (43.1)  | 0.60 (0.34-1.06)                   | 0.076         |                                        |
| Former          | 277                                 | 206 (74.4) | 367                                   | 255 (69.5) | 0.78 (0.65-0.94)                   | <b>0.010</b>  |                                        | 277                                 | 187 (67.5) | 367                                   | 227 (61.9) | 0.78 (0.64-0.95)                   | <b>0.012</b>  |                                        |
| Current         | 163                                 | 114 (69.9) | 254                                   | 152 (59.8) | 0.76 (0.60-0.98)                   | <b>0.034</b>  | 0.160                                  | 163                                 | 105 (64.4) | 254                                   | 130 (51.2) | 0.74 (0.57-0.96)                   | <b>0.024</b>  | 0.147                                  |
| Histology       |                                     |            |                                       |            |                                    |               |                                        |                                     |            |                                       |            |                                    |               |                                        |
| AD              | 230                                 | 147 (63.9) | 345                                   | 199 (57.7) | 0.76 (0.61-0.94)                   | <b>0.013</b>  |                                        | 230                                 | 135 (58.7) | 345                                   | 186 (53.9) | 0.78 (0.62-0.98)                   | <b>0.033</b>  |                                        |
| SC              | 107                                 | 77 (72.0)  | 177                                   | 114 (64.4) | 0.63 (0.46-0.86)                   | <b>0.004</b>  |                                        | 107                                 | 70 (65.4)  | 177                                   | 91 (51.4)  | 0.54 (0.39-0.76)                   | <b>0.0004</b> |                                        |
| Others          | 152                                 | 130 (85.5) | 164                                   | 122 (74.4) | 0.83 (0.64-1.07)                   | 0.143         | 0.851                                  | 152                                 | 119 (78.3) | 164                                   | 108 (65.9) | 0.83 (0.63-1.08)                   | 0.166         | 0.862                                  |
| Tumor stage     |                                     |            |                                       |            |                                    |               |                                        |                                     |            |                                       |            |                                    |               |                                        |
| I-III A         | 260                                 | 139 (53.5) | 394                                   | 175 (44.4) | 0.78 (0.62-0.97)                   | <b>0.028</b>  |                                        | 260                                 | 119 (45.8) | 394                                   | 134 (34.0) | 0.71 (0.56-0.92)                   | <b>0.008</b>  |                                        |
| III B-IV        | 229                                 | 215 (93.9) | 292                                   | 260 (89.0) | 0.78 (0.65-0.94)                   | <b>0.011</b>  | 0.562                                  | 229                                 | 205 (89.5) | 292                                   | 251 (86.0) | 0.80 (0.66-0.97)                   | <b>0.023</b>  | 0.747                                  |
| Chemotherapy    |                                     |            |                                       |            |                                    |               |                                        |                                     |            |                                       |            |                                    |               |                                        |
| No              | 256                                 | 161 (62.9) | 382                                   | 205 (53.7) | 0.77 (0.63-0.96)                   | <b>0.019</b>  |                                        | 256                                 | 140 (54.7) | 382                                   | 167 (43.7) | 0.75 (0.59-0.94)                   | <b>0.014</b>  |                                        |
| Yes             | 233                                 | 193 (82.8) | 304                                   | 230 (75.7) | 0.74 (0.61-0.90)                   | <b>0.003</b>  | 0.790                                  | 233                                 | 184 (79.0) | 304                                   | 218 (71.7) | 0.74 (0.61-0.91)                   | <b>0.004</b>  | 0.515                                  |
| Radiotherapy    |                                     |            |                                       |            |                                    |               |                                        |                                     |            |                                       |            |                                    |               |                                        |
| No              | 306                                 | 202 (66.0) | 455                                   | 247 (54.3) | 0.76 (0.63-0.92)                   | <b>0.004</b>  |                                        | 306                                 | 181 (59.2) | 455                                   | 210 (46.2) | 0.76 (0.62-0.93)                   | <b>0.007</b>  |                                        |
| Yes             | 183                                 | 152 (83.1) | 231                                   | 188 (81.4) | 0.72 (0.58-0.91)                   | <b>0.005</b>  | 0.818                                  | 183                                 | 143 (78.1) | 231                                   | 175 (75.8) | 0.72 (0.57-0.91)                   | <b>0.005</b>  | 0.815                                  |
| Surgery         |                                     |            |                                       |            |                                    |               |                                        |                                     |            |                                       |            |                                    |               |                                        |
| No              | 279                                 | 252 (90.3) | 356                                   | 313 (87.9) | 0.81 (0.68-0.96)                   | <b>0.014</b>  |                                        | 279                                 | 239 (85.7) | 356                                   | 295 (82.9) | 0.81 (0.68-0.96)                   | <b>0.016</b>  |                                        |
| Yes             | 210                                 | 102 (48.6) | 330                                   | 122 (37.0) | 0.71 (0.54-0.92)                   | <b>0.011</b>  | 0.374                                  | 210                                 | 85 (40.5)  | 330                                   | 90 (27.3)  | 0.65 (0.48-0.88)                   | <b>0.006</b>  | 0.173                                  |

Abbreviations: NSCLC, non-small cell lung cancer; PLCO, the Prostate, Lung, Colorectal and Ovarian Cancer Screening Trial; OS, overall survival; DSS, disease-specific survival; HR, hazards ratio; CI, confidence interval; AD, adenocarcinoma; SC, squamous cell carcinoma;

<sup>a</sup>10 missing date were excluded;

<sup>b</sup>Protective genotypes were *HBEGF* rs4150236 GA/AA and *ITPR3* rs116454384 CT/TT;

<sup>c</sup>Adjusted for age, sex, stage, histology, smoking status, chemotherapy, radiotherapy, surgery, PC1, PC2, PC3, and PC4;

<sup>d</sup>*P*<sub>inter</sub>: *P* value for interaction analysis between characteristic and risk genotypes.

**Supplementary Table 5.** Stratified analysis for association between the *HBEGF* rs4150236 and survival of NSCLC in the PLCO trial<sup>a</sup>

| Characteristics | OS          |            |                 |            |                                    |              |               | DSS         |            |                 |            |                                    |              |               |
|-----------------|-------------|------------|-----------------|------------|------------------------------------|--------------|---------------|-------------|------------|-----------------|------------|------------------------------------|--------------|---------------|
|                 | GG genotype |            | GA/AA genotypes |            | Multivariate analysis <sup>b</sup> |              | $P_{inter}^c$ | GG Genotype |            | GA/AA genotypes |            | Multivariate analysis <sup>b</sup> |              | $P_{inter}^c$ |
|                 | All         | Death (%)  | All             | Death (%)  | HR (95% CI)                        | <i>P</i>     |               | All         | Death (%)  | All             | Death (%)  | HR (95% CI)                        | <i>P</i>     |               |
| Age (years)     |             |            |                 |            |                                    |              |               |             |            |                 |            |                                    |              |               |
| ≤ 71            | 391         | 260 (66.5) | 243             | 139 (57.2) | 0.82 (0.67-1.02)                   | 0.070        |               | 391         | 236 (60.4) | 243             | 123 (50.6) | 0.82 (0.65-1.02)                   | 0.074        |               |
| > 71            | 322         | 240 (74.5) | 219             | 150 (68.5) | 0.81 (0.66-1.00)                   | 0.050        | 0.810         | 322         | 217 (67.4) | 219             | 133 (60.7) | 0.79 (0.63-0.99)                   | <b>0.037</b> | 0.461         |
| Sex             |             |            |                 |            |                                    |              |               |             |            |                 |            |                                    |              |               |
| Male            | 431         | 327 (75.9) | 264             | 178 (67.4) | 0.74 (0.62-0.90)                   | <b>0.002</b> |               | 431         | 327 (75.9) | 264             | 178 (67.4) | 0.72 (0.59-0.88)                   | <b>0.001</b> |               |
| Female          | 282         | 173 (61.4) | 198             | 111 (56.1) | 0.95 (0.74-1.22)                   | 0.682        | 0.196         | 282         | 173 (61.4) | 198             | 111 (56.1) | 0.96 (0.74-1.25)                   | 0.784        | 0.112         |
| Smoking status  |             |            |                 |            |                                    |              |               |             |            |                 |            |                                    |              |               |
| Never           | 62          | 40 (64.5)  | 52              | 22 (42.3)  | 0.55 (0.30-1.00)                   | 0.050        |               | 62          | 38 (61.3)  | 52              | 22 (42.3)  | 0.58 (0.31-1.06)                   | 0.077        |               |
| Former          | 409         | 300 (73.4) | 235             | 161 (68.5) | 0.77 (0.63-0.94)                   | <b>0.009</b> |               | 409         | 270 (66.0) | 235             | 144 (61.3) | 0.78 (0.63-0.96)                   | <b>0.019</b> |               |
| Current         | 242         | 160 (66.1) | 175             | 106 (60.6) | 0.91 (0.71-1.17)                   | 0.461        | 0.285         | 242         | 145 (59.9) | 175             | 90 (51.4)  | 0.86 (0.66-1.12)                   | 0.267        | 0.220         |
| Histology       |             |            |                 |            |                                    |              |               |             |            |                 |            |                                    |              |               |
| AD              | 329         | 205 (62.3) | 246             | 141 (57.3) | 0.85 (0.68-1.05)                   | 0.135        |               | 329         | 190 (57.8) | 246             | 131 (53.3) | 0.84 (0.67-1.06)                   | 0.135        |               |
| SC              | 174         | 121 (69.5) | 110             | 70 (63.6)  | 0.64 (0.47-0.88)                   | <b>0.006</b> |               | 174         | 106 (60.9) | 110             | 55 (50.0)  | 0.57 (0.41-0.81)                   | <b>0.002</b> |               |
| Others          | 210         | 174 (82.9) | 106             | 78 (73.6)  | 0.92 (0.70-1.22)                   | 0.564        | 0.951         | 210         | 157 (74.8) | 106             | 70 (66.0)  | 0.92 (0.69-1.24)                   | 0.588        | 0.959         |
| Tumor stage     |             |            |                 |            |                                    |              |               |             |            |                 |            |                                    |              |               |
| I-III A         | 390         | 203 (52.1) | 264             | 111 (42.1) | 0.71 (0.56-0.90)                   | <b>0.004</b> |               | 390         | 203 (52.1) | 264             | 111 (42.1) | 0.64 (0.49-0.84)                   | <b>0.001</b> |               |
| III B-IV        | 323         | 297 (92.0) | 198             | 178 (89.9) | 0.88 (0.72-1.06)                   | <b>0.177</b> | 0.328         | 323         | 297 (92.0) | 198             | 178 (89.9) | 0.89 (0.73-1.08)                   | 0.236        | 0.102         |
| Chemotherapy    |             |            |                 |            |                                    |              |               |             |            |                 |            |                                    |              |               |
| No              | 379         | 231 (61.0) | 259             | 135 (52.1) | 0.80 (0.65-1.00)                   | 0.046        |               | 379         | 231 (61.0) | 259             | 135 (52.1) | 0.78 (0.62-0.99)                   | 0.040        |               |
| Yes             | 334         | 269 (80.5) | 203             | 154 (75.9) | 0.78 (0.64-0.96)                   | <b>0.019</b> | 0.665         | 334         | 269 (80.5) | 203             | 154 (75.9) | 0.84 (0.68-0.97)                   | <b>0.026</b> | 0.460         |
| Radiotherapy    |             |            |                 |            |                                    |              |               |             |            |                 |            |                                    |              |               |
| No              | 455         | 283 (62.2) | 306             | 166 (54.3) | 0.85 (0.70-1.03)                   | 0.102        |               | 455         | 283 (62.2) | 306             | 166 (54.3) | 0.84 (0.68-1.03)                   | 0.100        |               |
| Yes             | 258         | 217 (84.1) | 156             | 123 (78.9) | 0.73 (0.58-0.92)                   | <b>0.008</b> | 0.412         | 258         | 217 (84.1) | 156             | 123 (78.9) | 0.74 (0.58-0.94)                   | <b>0.012</b> | 0.520         |
| Surgery         |             |            |                 |            |                                    |              |               |             |            |                 |            |                                    |              |               |
| No              | 393         | 357 (90.8) | 242             | 208 (86.0) | 0.85 (0.71-1.01)                   | 0.069        |               | 393         | 357 (90.8) | 242             | 208 (86.0) | 0.85 (0.71-1.02)                   | 0.087        |               |
| Yes             | 320         | 143 (44.7) | 220             | 81 (36.8)  | 0.76 (0.58-1.00)                   | 0.052        | 0.344         | 320         | 143 (44.7) | 220             | 81 (36.8)  | 0.69 (0.50-0.94)                   | <b>0.020</b> | 0.139         |

Abbreviations: NSCLC, non-small cell lung cancer; PLCO, the Prostate, Lung, Colorectal and Ovarian Cancer Screening Trial; OS, overall survival; DSS, disease-specific survival; HR, hazards ratio; CI, confidence interval; AD, adenocarcinoma; SC, squamous cell carcinoma.

<sup>a</sup> 10 missing date were excluded;

<sup>b</sup> Adjusted for age, sex, stage, histology, smoking status, chemotherapy, radiotherapy, surgery, PC1, PC2, PC3, and PC4;

<sup>c</sup>  $P_{inter}$ : *P* value for interaction analysis between characteristic and protective genotypes.

**Supplementary Table 6.** Stratified analysis for association between the *ITPR3* rs116454384 and survival of NSCLC in the PLCO trial

| Characteristics <sup>a</sup> | OS          |            |                 |            |                                    |              |                                        | DSS         |            |                 |            |                                    |              |                                        |
|------------------------------|-------------|------------|-----------------|------------|------------------------------------|--------------|----------------------------------------|-------------|------------|-----------------|------------|------------------------------------|--------------|----------------------------------------|
|                              | CC genotype |            | CT/TT genotypes |            | Multivariate analysis <sup>b</sup> |              | <i>P</i> <sub>inter</sub> <sup>c</sup> | CC Genotype |            | CT/TT genotypes |            | Multivariate analysis <sup>b</sup> |              | <i>P</i> <sub>inter</sub> <sup>c</sup> |
|                              | All         | Death (%)  | All             | Death (%)  | HR (95% CI)                        | <i>P</i>     |                                        | All         | Death (%)  | All             | Death (%)  | HR (95% CI)                        | <i>P</i>     |                                        |
| Age (years)                  |             |            |                 |            |                                    |              |                                        |             |            |                 |            |                                    |              |                                        |
| ≤ 71                         | 430         | 280 (65.1) | 204             | 119 (58.3) | 0.85 (0.69-1.06)                   | 0.148        |                                        | 430         | 250 (58.1) | 204             | 109 (53.4) | 0.88 (0.70-1.11)                   | 0.274        |                                        |
| > 71                         | 374         | 270 (72.2) | 167             | 120 (71.9) | 0.88 (0.70-1.10)                   | 0.248        | 0.956                                  | 374         | 249 (66.6) | 167             | 101 (60.5) | 0.81 (0.63-1.03)                   | 0.083        | 0.659                                  |
| Sex                          |             |            |                 |            |                                    |              |                                        |             |            |                 |            |                                    |              |                                        |
| Male                         | 459         | 334 (72.8) | 236             | 171 (72.5) | 0.87 (0.73-1.06)                   | 0.161        |                                        | 459         | 334 (72.8) | 236             | 171 (72.5) | 0.84 (0.69-1.03)                   | 0.095        |                                        |
| Female                       | 345         | 216 (62.6) | 135             | 68 (50.4)  | 0.80 (0.61-1.07)                   | 0.132        | 0.780                                  | 345         | 216 (62.6) | 135             | 68 (50.4)  | 0.80 (0.60-1.07)                   | 0.132        | 0.997                                  |
| Smoking status               |             |            |                 |            |                                    |              |                                        |             |            |                 |            |                                    |              |                                        |
| Never                        | 90          | 51 (56.7)  | 24              | 11 (45.8)  | 0.85 (0.40-1.80)                   | 0.676        |                                        | 90          | 49 (54.4)  | 24              | 11 (45.8)  | 0.93 (0.44-1.97)                   | 0.842        |                                        |
| Former                       | 429         | 307 (71.6) | 215             | 154 (71.6) | 0.98 (0.80-1.19)                   | 0.821        |                                        | 429         | 281 (65.5) | 215             | 133 (61.9) | 0.92 (0.74-1.13)                   | 0.391        |                                        |
| Current                      | 285         | 192 (67.4) | 132             | 74 (56.1)  | 0.66 (0.50-0.88)                   | <b>0.004</b> | 0.201                                  | 285         | 169 (59.3) | 132             | 66 (50.0)  | 0.69 (0.52-0.93)                   | <b>0.013</b> | 0.472                                  |
| Histology                    |             |            |                 |            |                                    |              |                                        |             |            |                 |            |                                    |              |                                        |
| AD                           | 411         | 251 (61.1) | 164             | 95 (57.9)  | 0.76 (0.59-0.97)                   | <b>0.027</b> |                                        | 411         | 230 (56.0) | 164             | 91 (55.5)  | 0.80 (0.62-1.03)                   | 0.085        |                                        |
| SC                           | 175         | 119 (68.0) | 109             | 72 (66.1)  | 0.85 (0.63-1.15)                   | 0.292        |                                        | 175         | 105 (60.0) | 109             | 56 (51.4)  | 0.72 (0.51-1.01)                   | 0.053        |                                        |
| Others                       | 218         | 180 (82.6) | 98              | 72 (73.5)  | 0.91 (0.69-1.20)                   | 0.502        | 0.583                                  | 218         | 164 (75.2) | 98              | 63 (64.3)  | 0.90 (0.67-1.21)                   | 0.478        | 0.942                                  |
| Tumor stage                  |             |            |                 |            |                                    |              |                                        |             |            |                 |            |                                    |              |                                        |
| I-III A                      | 442         | 214 (48.4) | 212             | 100 (47.2) | 0.98 (0.77-1.25)                   | 0.895        |                                        | 442         | 214 (48.4) | 212             | 100 (47.2) | 0.95 (0.72-1.25)                   | 0.703        |                                        |
| III B-IV                     | 362         | 336 (92.8) | 159             | 139 (87.4) | 0.82 (0.67-1.01)                   | 0.058        | 0.153                                  | 362         | 336 (92.8) | 159             | 139 (87.4) | 0.82 (0.67-1.01)                   | 0.067        | 0.333                                  |
| Chemotherapy                 |             |            |                 |            |                                    |              |                                        |             |            |                 |            |                                    |              |                                        |
| No                           | 440         | 258 (58.6) | 198             | 108 (54.6) | 0.87 (0.69-1.09)                   | 0.231        |                                        | 440         | 258 (58.6) | 198             | 108 (54.6) | 0.83 (0.64-1.07)                   | 0.143        |                                        |
| Yes                          | 364         | 292 (80.2) | 173             | 131 (75.7) | 0.85 (0.69-1.05)                   | 0.129        | 0.977                                  | 364         | 292 (80.2) | 173             | 131 (75.7) | 0.85 (0.68-1.05)                   | 0.127        | 0.744                                  |
| Radiotherapy                 |             |            |                 |            |                                    |              |                                        |             |            |                 |            |                                    |              |                                        |
| No                           | 521         | 314 (60.3) | 240             | 135 (56.3) | 0.89 (0.72-1.09)                   | 0.255        |                                        | 521         | 314 (60.3) | 240             | 135 (56.3) | 0.86 (0.69-1.08)                   | 0.193        |                                        |
| Yes                          | 283         | 236 (83.4) | 131             | 104 (79.4) | 0.80 (0.63-1.01)                   | 0.064        | 0.482                                  | 283         | 236 (83.4) | 131             | 104 (79.4) | 0.79 (0.62-1.02)                   | 0.066        | 0.624                                  |
| Surgery                      |             |            |                 |            |                                    |              |                                        |             |            |                 |            |                                    |              |                                        |
| No                           | 436         | 392 (89.9) | 199             | 173 (86.9) | 0.84 (0.70-1.01)                   | 0.065        |                                        | 436         | 392 (89.9) | 199             | 173 (86.9) | 0.84 (0.70-1.02)                   | 0.075        |                                        |
| Yes                          | 368         | 158 (42.9) | 172             | 66 (38.4)  | 0.88 (0.66-1.18)                   | 0.397        | 0.682                                  | 368         | 158 (42.9) | 172             | 66 (38.4)  | 0.81 (0.58-1.14)                   | 0.229        | 0.928                                  |

Abbreviations: NSCLC, non-small cell lung cancer; PLCO, the Prostate, Lung, Colorectal and Ovarian Cancer Screening Trial; OS, overall survival; DSS, disease-specific survival; HR, squamous cell carcinoma.

<sup>a</sup> 10 missing date were excluded;

<sup>b</sup> Adjusted for age, sex, stage, histology, smoking status, chemotherapy, radiotherapy, surgery, PC1, PC2, PC3, and PC4;

<sup>c</sup> *P*<sub>inter</sub>: *P* value for interaction analysis between characteristic and protective genotypes.

## **Supplemental Acknowledgements**

We wish to thank all of the investigators and funding agencies that enabled the deposition of data in dbGaP and PLCO that we used in the present study:

The datasets used for the analyses described in the present study were obtained from dbGaP at <http://www.ncbi.nlm.nih.gov/gap> through dbGaP accession number phs000336.v1.p1 and phs000093.v2.p2. Principal Investigators: Maria Teresa Landi. Genetic Epidemiology Branch, Division of Cancer Epidemiology and Genetics, National Cancer Institute, National Institutes of Health, Bethesda, MD, USA. Neil E. Caporaso. Genetic Epidemiology Branch, Division of Cancer Epidemiology and Genetics, National Cancer Institute, National Institutes of Health, Bethesda, MD, USA.

Funding support for the GWAS of Lung Cancer and Smoking was provided through the NIH Genes, Environment and Health Initiative [GEI] (Z01 CP 010200). The human subjects participating in the GWAS derive from The Environment and Genetics in Lung Cancer Etiology (EAGLE) case-control study and the Prostate, Lung Colon and Ovary Screening Trial and these studies are supported by intramural resources of the National Cancer Institute. Assistance with phenotype harmonization and genotype cleaning, as well as with general study coordination, was provided by the Gene Environment Association Studies, GENEVA Coordinating Center (U01HG004446). Assistance with data cleaning was provided by the National Center for Biotechnology Information. Funding support for genotyping, which was performed at the Johns Hopkins University Center for Inherited Disease Research, was provided by the NIH GEI (U01HG004438).

PLCO was also supported by the Intramural Research Program of the Division of Cancer Epidemiology and Genetics and by contracts from the Division of Cancer Prevention, National Cancer Institute, NIH, DHHS. The authors thank PLCO screening center investigators and staff, and the staff of Information Management Services Inc. and Westat Inc. Most importantly, we acknowledge trial participants for their contributions that made this study possible.
